# Supplementary material
Source: Research Square preprint supplement (doi:10.21203/rs.3.rs-9265381/v1)
Supplement: Supplementary file 1 [file 0e167ed466a3be5b3c1eae4e.docx]

| **Variable** | | **Total**  **(n = 27)** | | **MRD persistence**  **(n = 20)** | **MRD Relapse**  **(n = 7)** |
| --- | --- | --- | --- | --- | --- |
| Age, years, mean (range) | | 39 (15-61) | | 36 (15-61) | 55 (26-60) |
| Male, % | | 10, 37.0% | | 7, 35.0% | 3, 42.9% |
| Female, % | | 17, 63.0% | | 13, 65.0% | 4, 57.1% |
| BM blast, %, median (range) | | 61.0 (27.0-92.0) | | 63.8 (50.0-90.0) | 61.0 (27.0-92.0) |
| *CBFB-MYH11* level at diagnosis, %, median (range) | | 147.40  (8.10-675.20) | | 146.72  (8.10-258.49) | 268.30  (46.37-675.20) |
| Additional cytogenetic abnormalities, No.(%) | | |  | |  |
| *NRAS* |  | 13 (48.1%) | | 8 (40.0%) | 5 (71.4%) |
| *KIT* |  | 12 (44.4%) | | 12 (60.0%) | 0 (0.0%) |
| *KRAS* |  | 7 (25.9%) | | 4 (20.0%) | 3 (42.9%) |
| *FLT3* |  | 7 (25.9%) | | 4 (20.0%) | 3 (42.9%) |
| *PTPN11* |  | 4 (14.8%) | | 1 (5.0%) | 3 (42.9%) |
| *NF1* |  | 3 (11.1%) | | 3 (15.0%) | 0 (0.0%) |
| *WT1* |  | 2 (7.4%) | | 1 (5.0%) | 1 (14.3%) |
| No. of previous HDAC Cycles, median (range) | | 2 (0-4) | | 3 (0-4) | 2 (1-4) |
| No. of previous cycles, median (range) | | 5 (2-9) | | 4 (2-9) | 6 (4-9) |

**Table 1. Baseline Characteristics of 27 Patients in the Study Cohort.**

Abbreviations: MRD, measurable residual disease; BM blast, bone marrow blast; HDAC, high dose cytarabine
